# Supplementary material for: Plasmalogens: Free Radical Reactivity and Identification of Trans Isomers Relevant to Biological Membranes
Source: MDPI journal article supplement (doi:10.3390/biom13050730), 2023-04-24
Supplement: s1 [file s1]

# **Plasmalogens: Free Radical Reactivity and Identification of Trans Isomers Relevant to Biological Membranes**

Carla Ferreri 1,<sup>\*</sup>, Alessandra Ferocino 1,<sup>†</sup>, Gessica Batani 1, Chrysostomos Chatgililoglu 1,2, Vanda Randi 3, Maria Vittoria Riontino 3, Fabrizio Vetica 1,<sup>‡</sup> and Anna Sansone 1

SUPPORTING INFO

**Table S1:** FAME yield (%) derived from the transesterification of C18plasm20:4-PC (0.32 mmol/mL) under three different conditions: A) basic condition 0.5M KOH/MeOH at room temperature (r.t.); B) acidic condition 1: 1.5% HCl/MeOH at 100 °C; C) acidic condition 2: 14% BF<sub>3</sub>/MeOH at 50 °C, as described in the Experimental Part of the main text.

| Fatty acid derivative <sup>a</sup> | Transesterification conditions            |                                            |                                            |
|------------------------------------|-------------------------------------------|--------------------------------------------|--------------------------------------------|
|                                    | Condition A<br>μmol/mL; yield(%)<br>(n=3) | Condition B<br>μmol/mL; yield (%)<br>(n=3) | Condition C<br>μmol/mL; yield (%)<br>(n=3) |
| 18:0 DMA                           | n.d.                                      | 0.16 <sup>#</sup> ; 52%                    | 0.095 <sup>#</sup> ; 32.5% <sup>EEE</sup>  |
| 20:4 ARA Methyl ester              | 0.32 <sup>#</sup> ; 100%                  | 0.29 <sup>#</sup> ; 92% <sup>**</sup>      | 0.18 <sup>#</sup> ; 56% <sup>###;EEE</sup> |

<sup>a</sup>cis FAME and DMA identified by standard references, quantified using heptadecanoic acid (17:0) as internal GC standard, as described in Methods. <sup>#</sup>yields of the three repetitions were found with errors <0.005%. Statistics: unpaired *t* test: <sup>\*\*</sup>A vs B; *p* value ≤ 0.005; <sup>###</sup>A vs C ; *p* value ≤ 0.0001; <sup>EEE</sup>B vs C; *p* value ≤ 0.0001. n.d = not detected

**Table S2.** Transformation of linoleic acid (9cis,12cis-18:2) residues of soybean lecithin into fatty acid methyl ester (FAME) under alkaline (0.5 M KOH/MeOH at r.t.) and acidic (1.5% HCl/ MeOH at 100 °C) conditions.

| FAME <sup>1</sup> | Alkaline condition<br>yield %<br>Mean ± sd (n=3) | Acidic condition<br>yield %<br>Mean ± sd (n=3) |
|-------------------|--------------------------------------------------|------------------------------------------------|
| 18:2              | 100 ± 0                                          | 93 ± 3                                         |

<sup>1</sup> FAME identified by standard reference, quantified using heptadecanoic acid (17:0) as internal GC standard, as described in Methods.

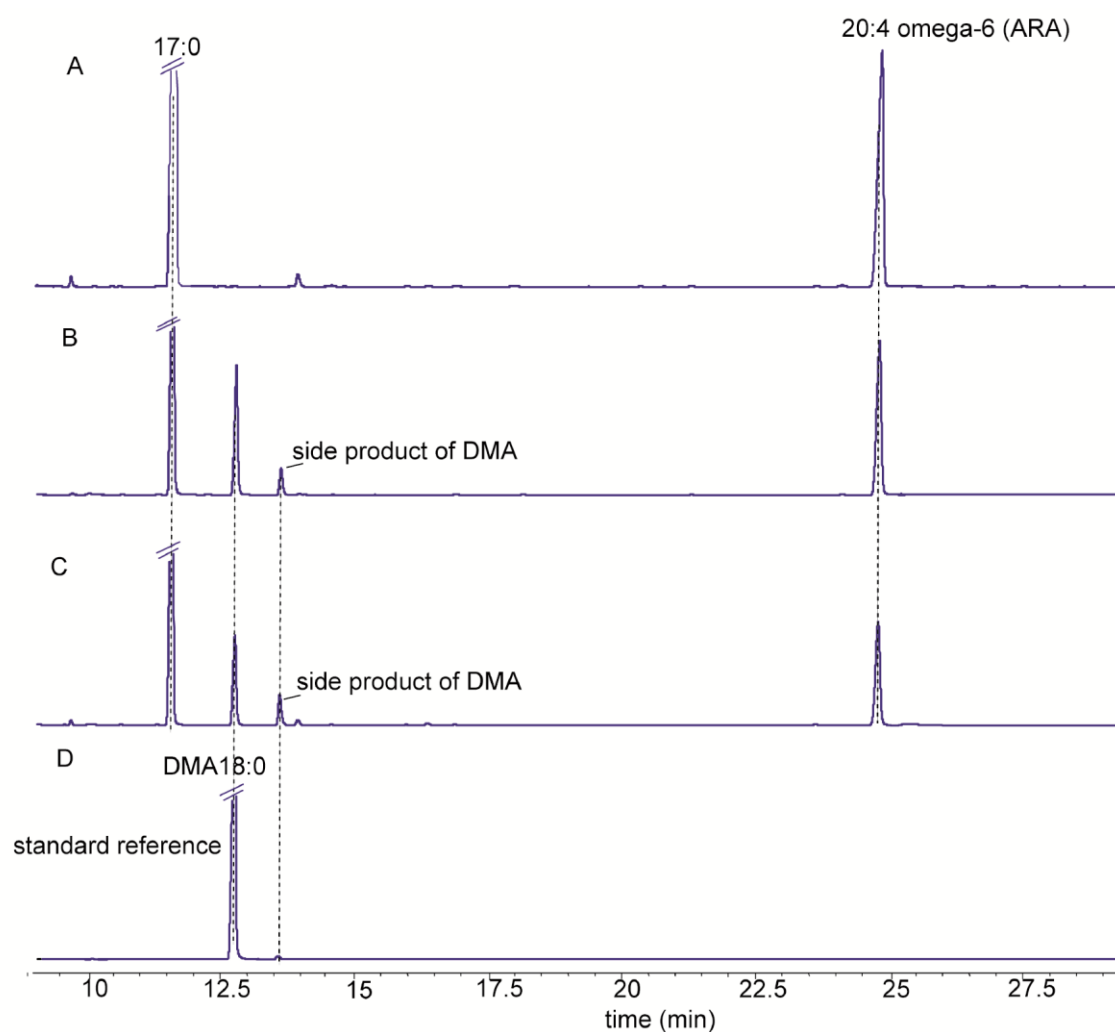

**Figure S1:** GC chromatograms of plasmalogen (C18 plasm 20:4-PC) transesterification performed in three conditions: A (alkaline: 0.5 M KOH/MeOH, r.t.); B (acidic: 1.5% HCl/MeOH, 100 °C) ; C (acidic: 14% BF<sub>3</sub>/MeOH, 50 °C); In trace D the standard reference of 18:0 DMA is shown, together with DMA side product.

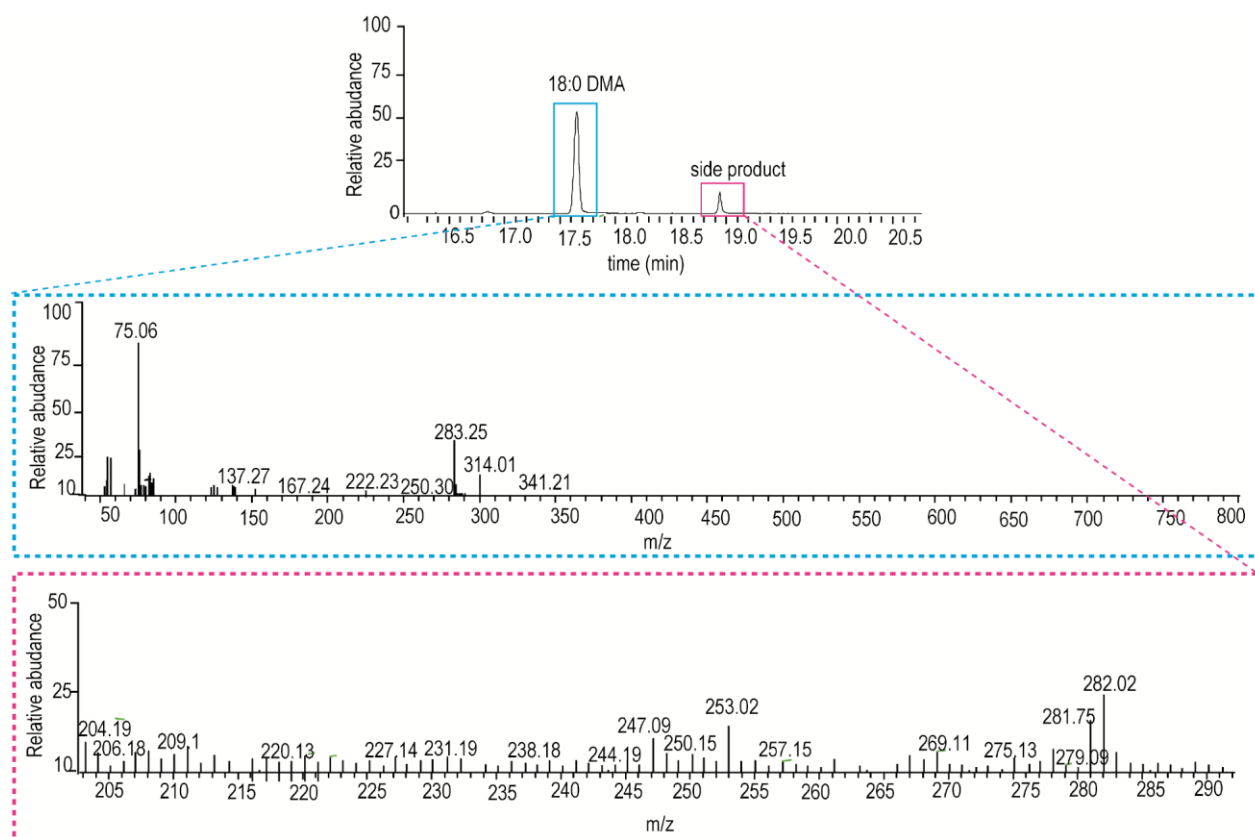

**Figure S2:** GC/MS chromatogram showing 18:0 DMA and the side product after plasmalogen transesterification in acidic condition; in the cyan box diagnostic fragments corresponding to 18:0 DMA with molecular peak ( $m/z$  283.75); in the purple box fragmentation of the 18:0 DMA by-product.

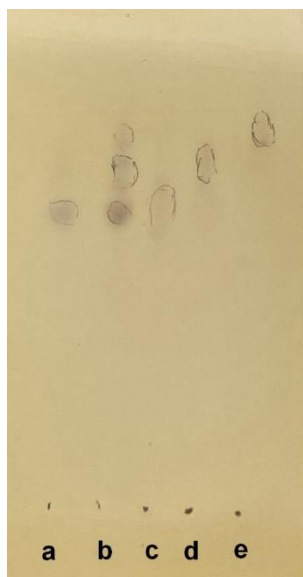

**Figures S3.** Ag-TLC monitoring of the photoisomerization (b) of plasmalogen (C18 plasm 20:4-PC) (a) (eluent  $\text{CHCl}_3:\text{MeOH}:\text{H}_2\text{O} = 4.5:2.3:0.2$ ) showing separation of the fractions (c,d,e). The (d) and (e) fractions correspond to trans-containing plasmalogens and attempts for their isolation were made by the same eluent using preparative Ag-TLC. Fractions were not stable during isolation, and it was not possible to characterize them further.

C18 plasm 20:4-PC - Plasmalogen (starting material)

$^1\text{H}$  NMR (500 MHz, Benzene- $d_6$ )  $\delta$  6.22 (bs, 1H,  $-\text{OCH}=\text{C}$  alkenyl ether), 5.62 (m, 1H, CH glycerol), 5.52 (m, 8H, alkenyl H), 4.55 (q,  $J = 10.0$  Hz, 1H, CH alkenyl ether), 4.45 (bs, choline  $\text{CH}_2$ ), 4.30 (m, 2H, glycerol  $\text{CH}_2$ ), 4.25-4.16 (m, 2H, glycerol  $\text{CH}_2$ ), 3.84 (bm, 2H, choline H), 3.49 (s, 9H,  $\text{N}(\text{CH}_3)_3$ ), 2.92 (m, 6H, bisallylic  $\text{CH}_2$ ), 2.42 (bs, 2H,  $\text{CH}_2$  alpha to  $\text{C}=\text{O}$ ), 2.34 (q,  $J = 10$  Hz,  $\text{CH}_2\text{C}=\text{CH}$  allylic), 2.18 (m, 2H,  $\text{CH}_2\text{CH}=\text{CHO}$ ), 2.09 (q,  $J = 10$  Hz,  $\text{CH}_2\text{C}=\text{CH}$  allylic), 1.83, (q,  $J=10\text{Hz}$ , 2H,  $\text{CH}_2\text{CH}_2\text{CH}_2\text{C}(\text{O})\text{OR}$ ), 1.52-1.27 (m, 34H,  $\text{CH}_2$ ), 0.91 (t,  $J = 10$  Hz, 6H, 2x  $\text{CH}_3$ ).

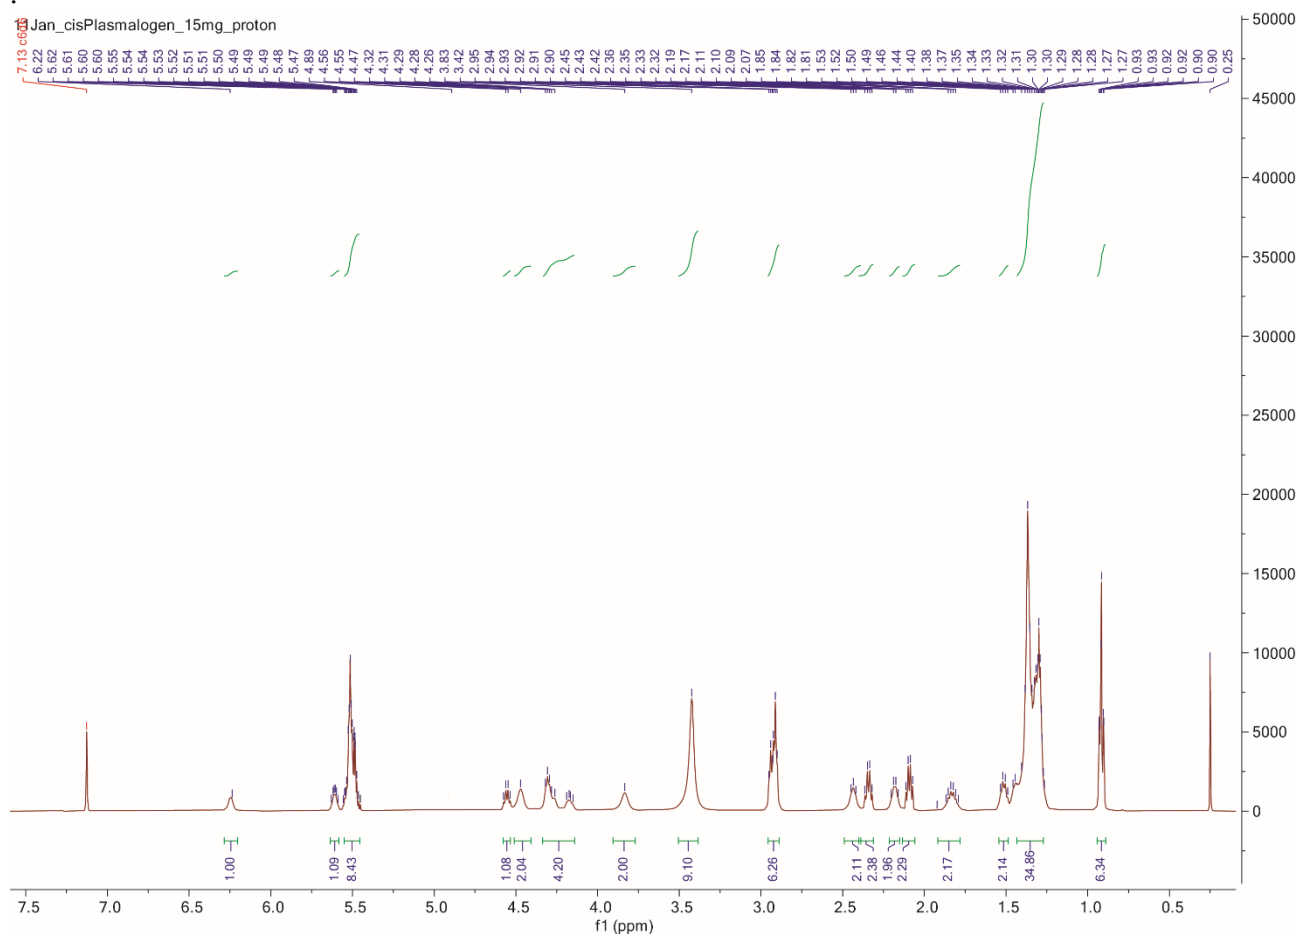

**Figure S4.**  $^1\text{H}$  NMR spectrum of commercially available plasmalogen in  $\text{C}_6\text{D}_6$

C18 plasm 20:4-PC - Plasmalogen (starting material)

$^{13}\text{C}$  NMR (126 MHz, Benzene- $d_6$ )  $\delta$  172.84, 145.66, 130.33, 129.27, 128.77, 128.62, 128.31, 128.30, 127.99, 127.47, 107.07, 72.50, 72.44, 71.20, 66.06, 63.60, 59.59, 53.98, 33.87, 32.03, 31.54, 30.26, 30.09, 30.07, 30.05, 30.02, 30.00, 29.96, 29.33, 29.85, 29.81, 29.53, 29.43, 27.29, 26.60, 25.77, 25.73, 25.71, 25.11, 24.41, 22.80, 22.67, 14.04, 14.02.

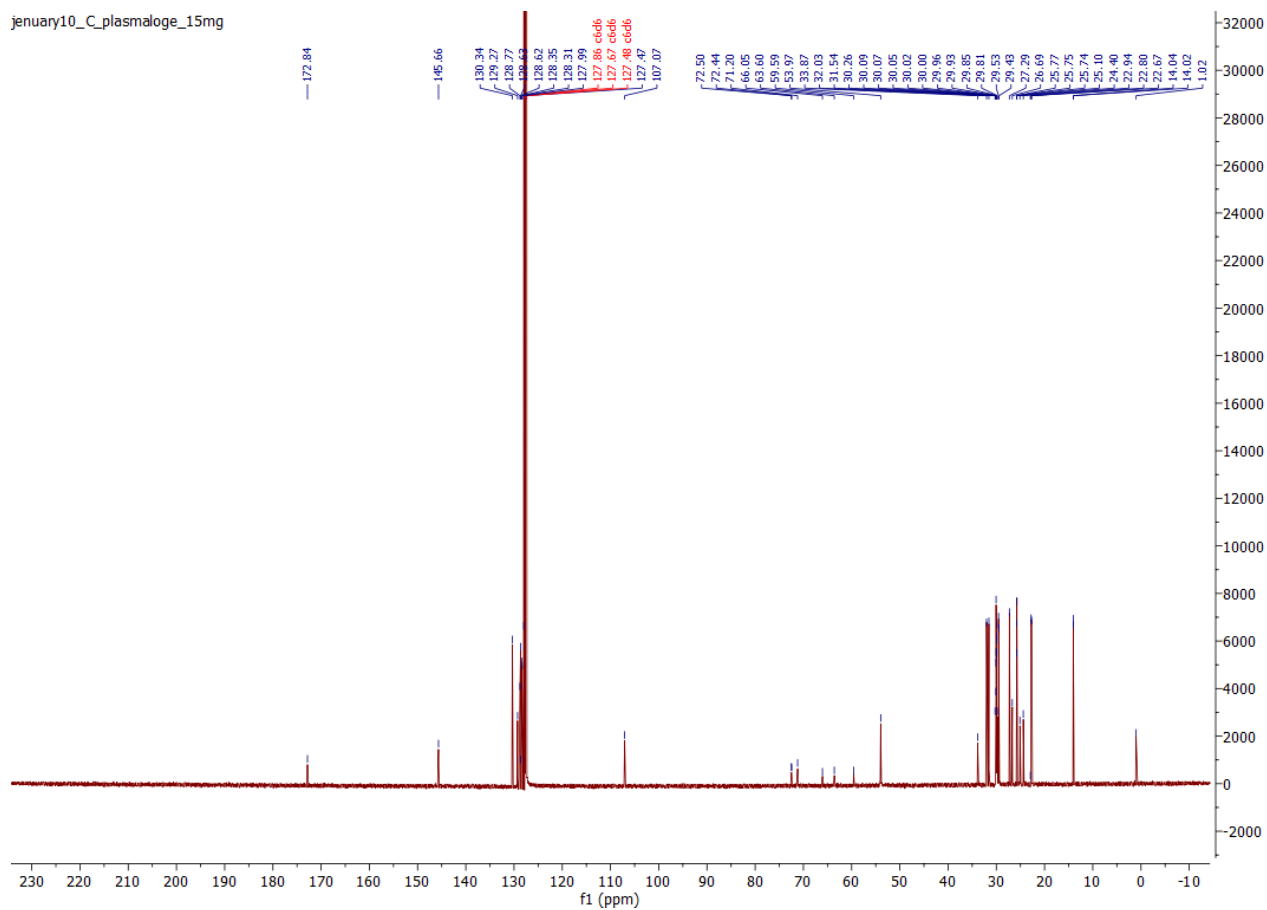

**Figure S5.**  $^{13}\text{C}$  NMR spectrum of commercially available plasmalogen in  $\text{C}_6\text{D}_6$

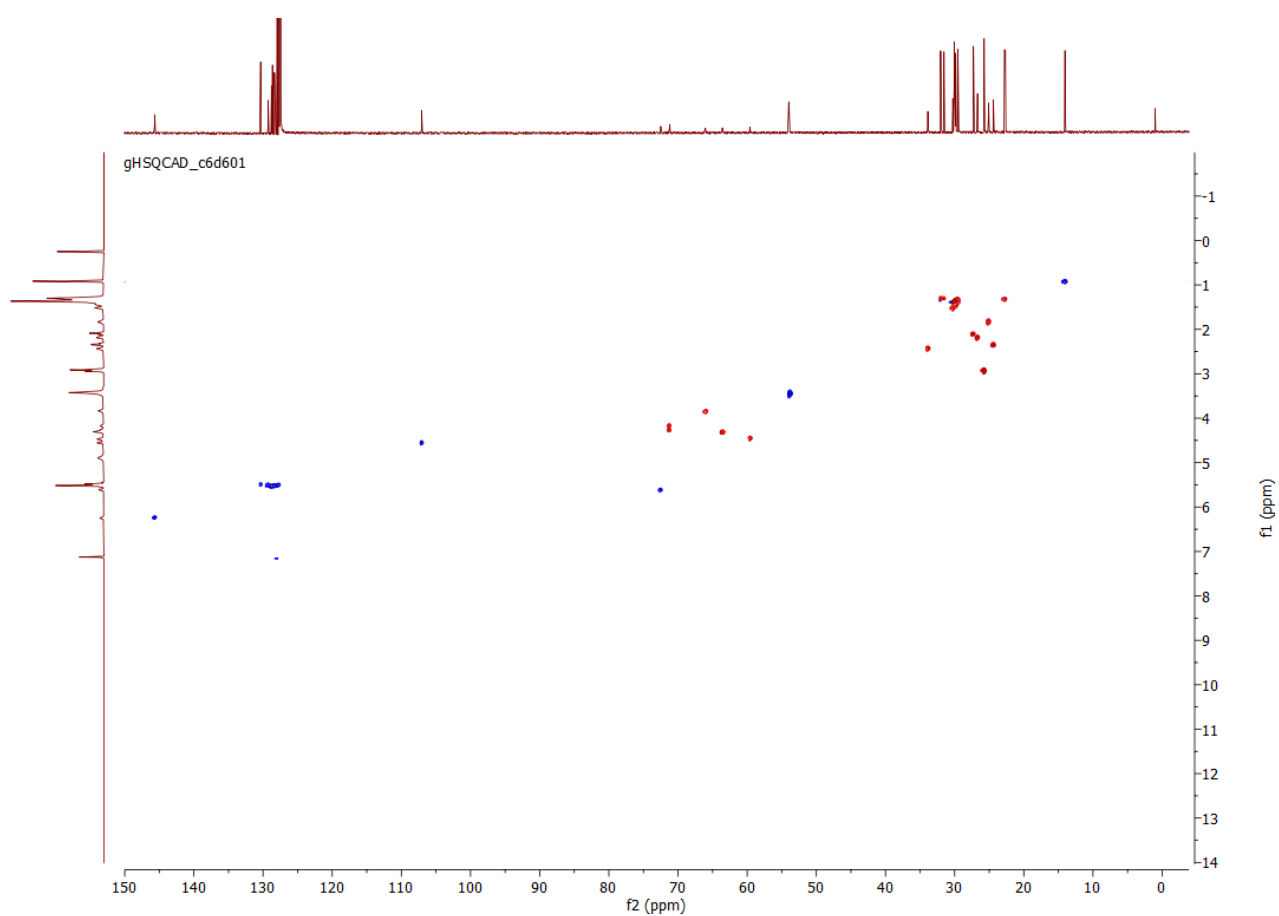

**Figure S6a:** HSQC 2D-NMR spectrum of commercially available plasmalogen in  $C_6D_6$

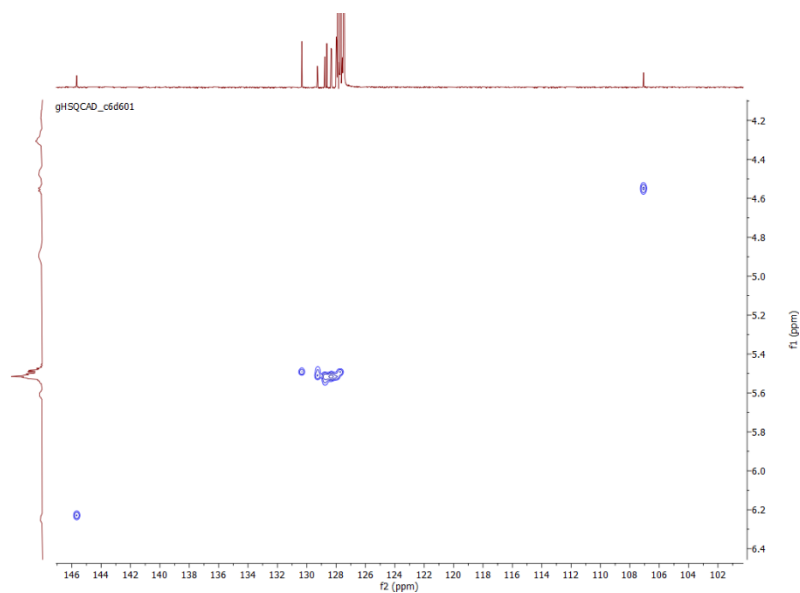

**Figure S6b:** HSQC 2DNMR 4.1-6.4 ppm region containing the resonances of the vinyl ether and alkenyl moieties of all cis plasmalogen



Photoisomerization mixture containing cis/trans C18 plasm 20:4-PC

$^1\text{H}$  NMR (500 MHz, Benzene- $d_6$ )  $\delta$  6.37 (d,  $J=10\text{Hz}$ , 28% trans -OCH=C alkenyl ether), 6.18 (bs, 1H, cis -OCH=C alkenyl ether), 5.62 (m, 1H, CH glycerol), 5.52 (m, 8H, alkenyl H), 4.92 (m, 1H, trans CH alkenyl ether) 4.50 (q,  $J = 10.0\text{ Hz}$ , 1H, cis CH alkenyl ether), 4.45 (bs, choline  $\text{CH}_2$ ), 4.30 (m, 2H, glycerol  $\text{CH}_2$ ), 4.25-4.16 (m, 2H, glycerol  $\text{CH}_2$ ), 3.84 (bm, 2H, choline H), 3.49 (s, 9H,  $\text{N}(\text{CH}_3)_3$ ) 2.92 (m, 6H, bisallylic  $\text{CH}_2$ ), 2.78 (m, trans bisallylic H), 2.42 (bs, 2H,  $\text{CH}_2$  alpha to  $\text{C}=\text{O}$ ), 2.34 (q,  $J = 10\text{ Hz}$ ,  $\text{CH}_2\text{C}=\text{CH}$  allylic), 2.18 (m, 2H,  $\text{CH}_2\text{CH}=\text{CHO}$ ), 2.09 (q,  $J = 10\text{ Hz}$ ,  $\text{CH}_2\text{C}=\text{CH}$  allylic), 1.97 (m, trans CH allyl), 1.98-2.04 (m, 1.83 (q,  $J=10\text{Hz}$ , 2H,  $\text{CH}_2\text{CH}_2\text{CH}_2\text{C}(\text{O})\text{OR}$ ), 1.52-1.27 (m, 34H,  $\text{CH}_2$ ), 0.91 (t,  $J = 10\text{ Hz}$ , 6H,  $2\times\text{CH}_3$ ).

See enlargements in the main text – Figure 2

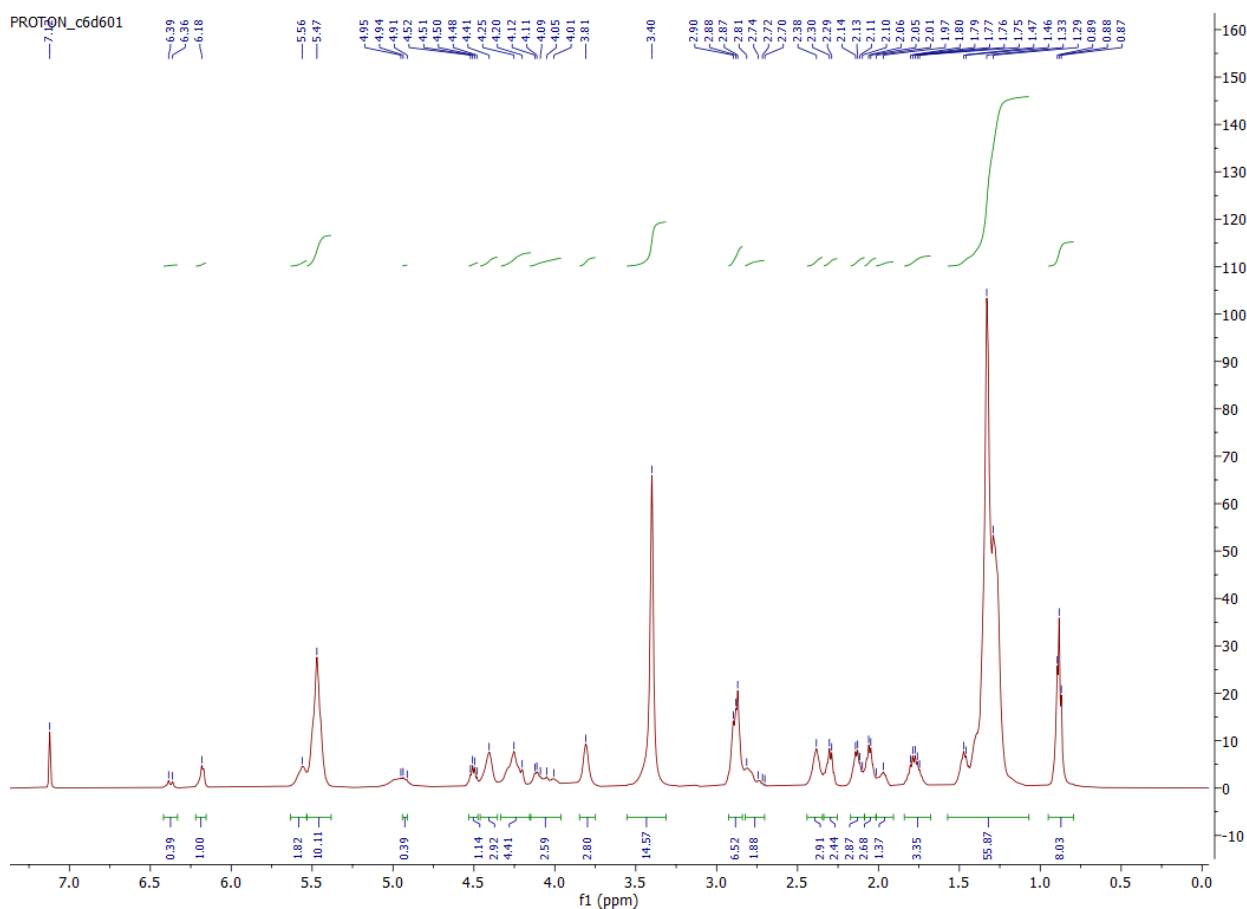

**Figure S7.**  $^1\text{H}$  NMR spectrum in  $\text{C}_6\text{D}_6$  of the reaction mix of plasmalogen isomerization after 4 min photolysis under the condition described in the Methods

Photoisomerization mixture containing cis/trans C18 plasm 20:4-PC

$^{13}\text{C}$  NMR (126 MHz, Benzene- $d_6$ )  $\delta$  172.84, **146.32**, **145.66**, **130.90**, **130.51**, **130.34**, **130.26**, **130.21**, 129.25, 128.76, 128.62, 128.33, 128.30, 127.98, 127.94, **107.07**, **104.65**, 72.50, 72.44, 71.20, 66.06, 63.60, 59.59, 53.98, 33.87, 32.03, 31.54, 30.26, 30.09, 30.07, 30.05, 30.02, 30.00, 29.96, 29.33, 29.85, 29.81, 29.53, 29.43, 27.29, 26.60, 25.77, 25.73, 25.71, 25.11, 24.41, 22.80, 22.67, 14.04, 14.02.

See enlargements in the main text – Figure 2

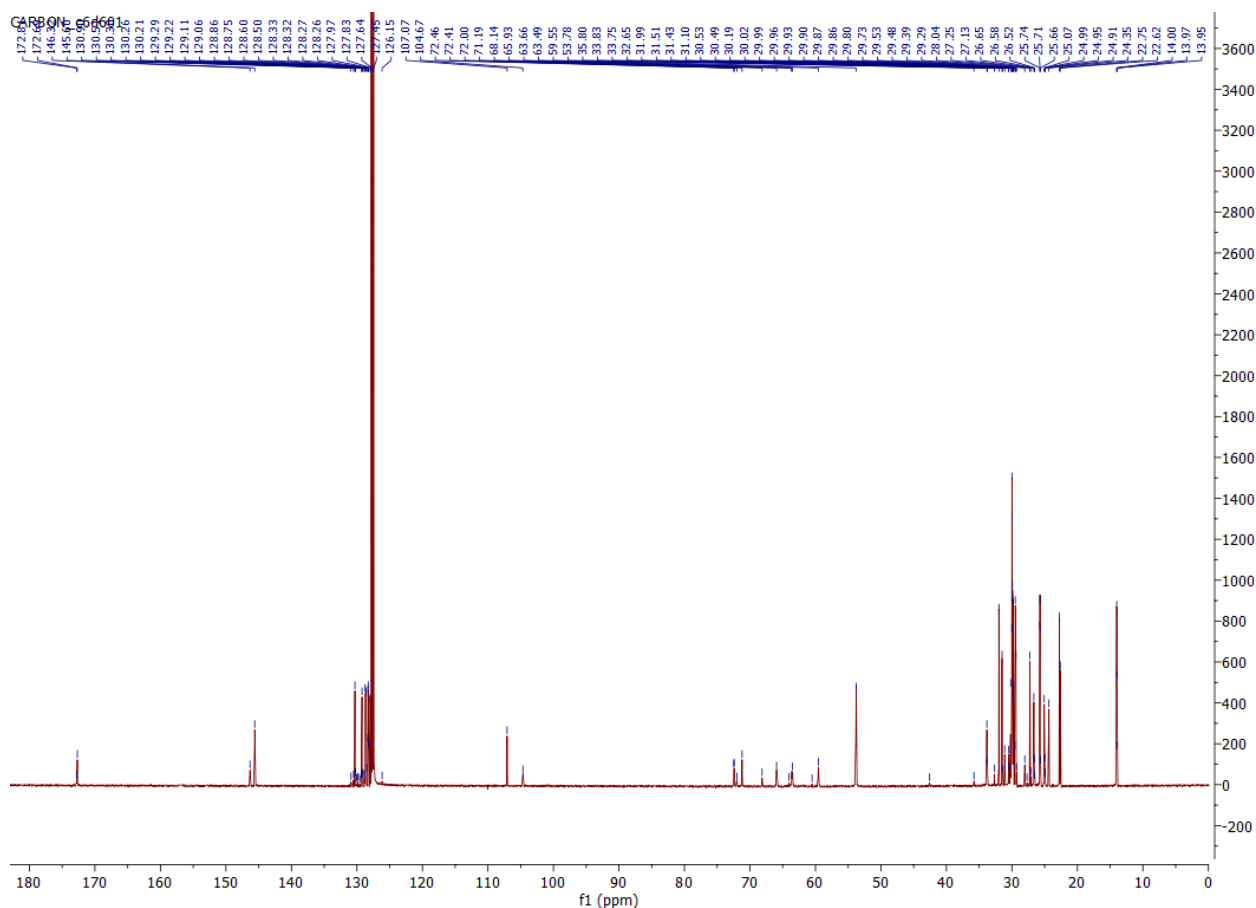

**Figure S8.**  $^{13}\text{C}$  NMR spectrum in  $\text{C}_6\text{D}_6$  of the reaction mix of plasmalogen isomerization after 4 min photolysis under the condition described in the Methods.

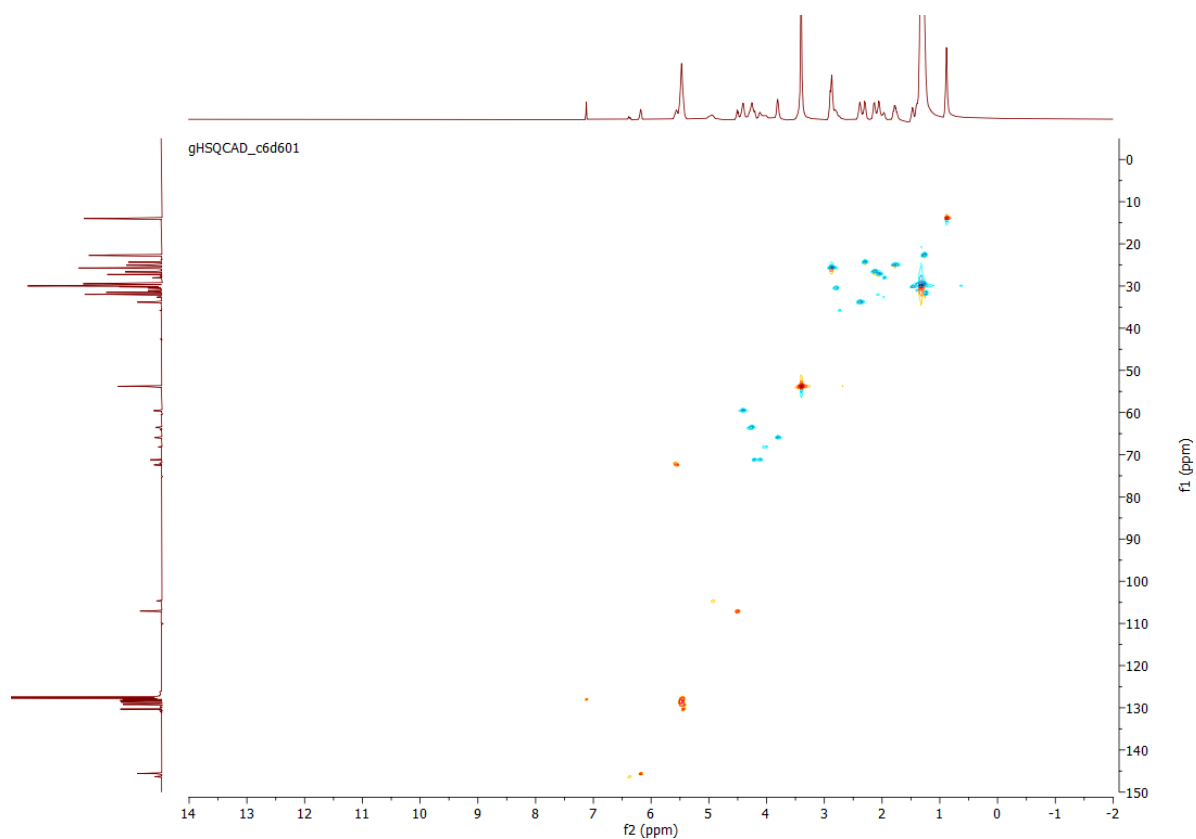

**Figure S9a:** HSQC 2D NMR spectrum of the mixture cis-trans plasmalogen in  $C_6D_6$

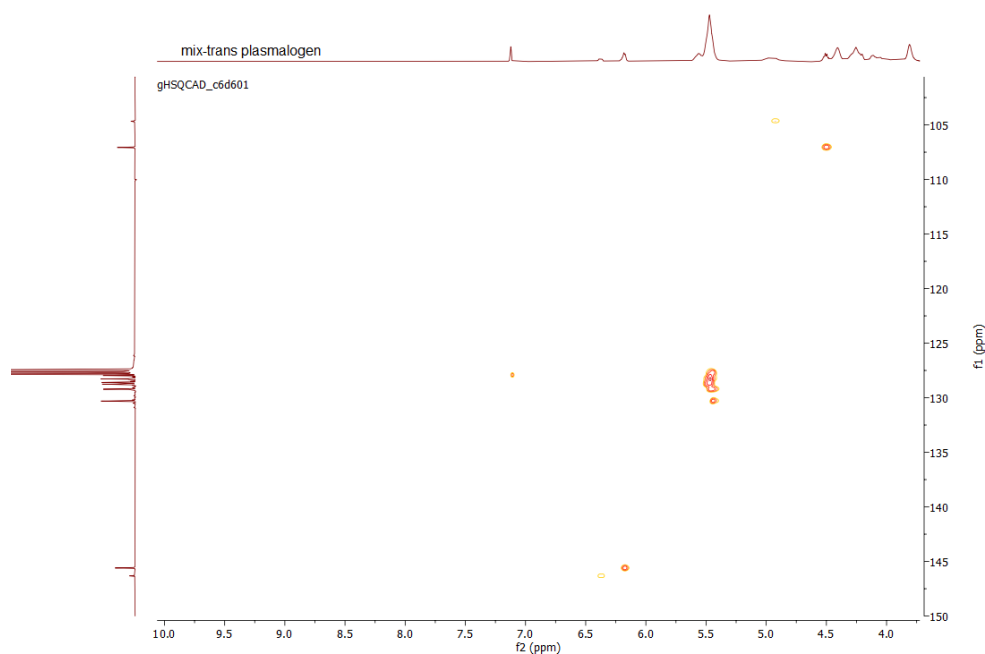

**Figure S9b:** HSQC 2D NMR 3.9-10 ppm enlargement containing the vinyl ether and alkenyl resonances in the mixture of cis-trans plasmalogen

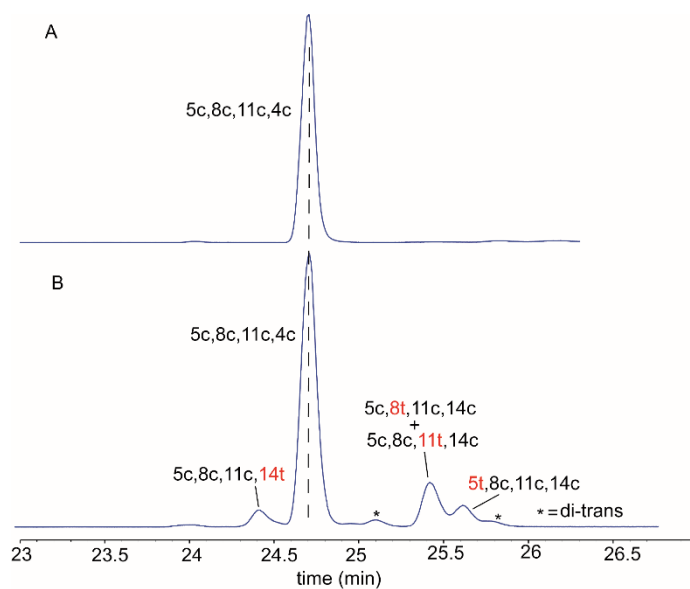

**Figure S10:** Enlargement of GC traces referred to: A, standard reference of arachidonic acid methyl ester (Ara-Me); B, mixture of cis and monotrans-Ara-Me obtained by transesterification of the plasmalogen photolysis mixture after 4 min of irradiation (traces of di-trans Ara-Me (\*) are also detected).

### SAPC Liposome Incubation

See Methods for details

**Table S3.** SAPC liposome (1 mM) aqueous suspension under oxidation condition incubated at 37 °C in open air for 15 h. Experiments were performed in triplicates.

| OXIDATION CONDITION                                                                                                                     | Ara loss<br>n=3 |
|-----------------------------------------------------------------------------------------------------------------------------------------|-----------------|
| Fe(NH <sub>4</sub> ) <sub>2</sub> (SO <sub>4</sub> ) <sub>2</sub> × 6H <sub>2</sub> O (10 μM)<br>H <sub>2</sub> O <sub>2</sub> (100 μM) | 73.2±0.7        |

### Details of Figure 3

**Table S4.** Follow-up of the isomerization of C18 plasm 20:4-PC (0.125 mM) in presence of 2-mercaptoethanol (0.5 equiv) at different times (1,2.5, 4 min): **vinyl ether** obtained by NMR in deuterated benzene of the reaction crude; **monotrans Ara** analysed by GC after work-up to obtain arachidonic acid methyl ester (AraMe), as described in Methods. Data are in the main text as Figure 3.

| Photolysis<br>(min) | vinyl ether * |             | monotrans Ara <sup>§</sup> |                             |               |
|---------------------|---------------|-------------|----------------------------|-----------------------------|---------------|
|                     | trans OCHCH   | trans OCHCH | 5t,8c,11c,14c              | 5c,8t,11c,14c+5c,8c,11t,14c | 5c,8c,11c,14t |
| 1                   | 12%           | 11%         | 3.0%                       | 6.5%                        | 3.1%          |
| 2.5                 | 23%           | 22%         | 4.6%                       | 10.5%                       | 4.7%          |
| 4                   | 33%           | 32%         | 7.8%                       | 15.5%                       | 7.5%          |

\*The percentage of isomerization of vinyl ether was obtained by <sup>1</sup>H NMR using TMS as reference (see Methods); <sup>§</sup>the percentages of Ara monotrans isomers were obtained by GC analysis.
